# Supplementary material
Source: Springer Nature journal article supplement (https://repositorio.tec.mx/bitstream/handle/11285/613663/12914_2003_12_MOESM1_ESM.pdf)
Supplement: MOESM1 [file 12914_2003_12_MOESM1_ESM.pdf]

**This material is to help you deliver contraceptive methods in an easy, safe and quick way with high quality criteria.**

**Start the conversation asking:**

**Would you like to have a child during the next year?**

**Finish**

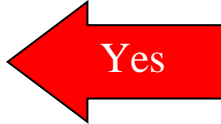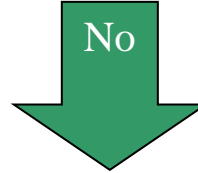

**Are you using any method or have you had a sterilization to stop having children?**

**Finish**

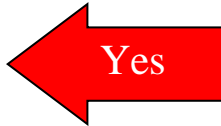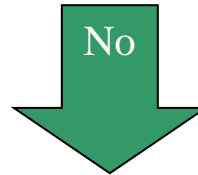

**Do you want to use a method to space or limit childbirth?**

**Finish**

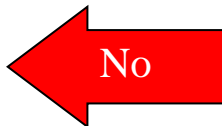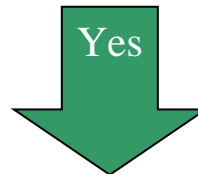

**Explain and offer family planning methods**
